# Supplementary material for: Diet‐wide association study of 92 foods and nutrients and lung cancer risk in the European Prospective Investigation into Cancer and Nutrition study and the Netherlands Cohort Study
Source: PubMed Central journal article supplement (PMC9804326; doi:10.1002/ijc.34211), 2022-08-04

## **Diet-wide association study of 92 foods and nutrients and lung cancer risk in the European Prospective Investigation into Cancer and Nutrition study and the Netherlands Cohort Study**

Alicia K. Heath, David C. Muller, Piet A. van den Brandt, Elena Critselis, Marc Gunter, Paolo Vineis, Elisabete Weiderpass, Heiner Boeing, Pietro Ferrari, Melissa A. Merritt, Agnetha L. Rostgaard-Hansen, Anne Tjønneland, Kim Overvad, Verena Katzke, Bernard Srour, Giovanna Masala, Carlotta Sacerdote, Fulvio Ricceri, Fabrizio Pasanisi, Bas Bueno-de-Mesquita, George S. Downward, Guri Skeie, Torkjel M. Sandanger, Marta Crous-Bou, Miguel Rodríguez-Barranco, Pilar Amiano, José María Huerta, Eva Ardanaz, Isabel Drake, Mikael Johansson, Ingegerd Johansson, Tim Key, Nikos Papadimitriou, Elio Riboli, Ioanna Tzoulaki, Konstantinos K. Tsilidis

### **Supplementary Figures and Tables**

|                                                                                                                                                                                                                                                                                                  |   |
|--------------------------------------------------------------------------------------------------------------------------------------------------------------------------------------------------------------------------------------------------------------------------------------------------|---|
| Supplementary Table 1: Mean (standard deviation) intakes of the 92 foods and nutrients investigated in relation to risk of lung cancer in the European Prospective Investigation into Cancer and Nutrition.....                                                                                  | 2 |
| Supplementary Table 2: Hazard ratios and 95% confidence intervals for lung cancer in EPIC and the NLCS in relation to intakes of the six foods and nutrients identified in the diet-wide association study, overall and for different histological subtypes. ....                                | 6 |
| Supplementary Table 3: Hazard ratios and 95% confidence intervals for lung cancer in the NLCS in relation to intakes of the six foods and nutrients identified in the diet-wide association study in EPIC, by smoking status at baseline. ....                                                   | 7 |
| Supplementary Table 4: Hazard ratios and 95% confidence intervals for lung cancer in the NLCS in relation to intakes of the six foods and nutrients identified in the diet-wide association study in EPIC, by sex. ....                                                                          | 8 |
| Supplementary Figure 1: Estimated rate ratios and 95% confidence intervals of lung cancer for intakes of the six foods and nutrients identified in the European Prospective Investigation into Cancer and Nutrition, before and after adjusting for circulating concentrations of cotinine. .... | 9 |

#### Separate files:

Appendix 1: Estimates from Cox regression models for a one standard deviation increment in intake of 92 foods and nutrients in relation to risk of lung cancer in the European Prospective Investigation into Cancer and Nutrition.

Appendix 2: Pairwise correlations for the 92 foods and nutrients included in the diet-wide association study of lung cancer risk in the European Prospective Investigation into Cancer and Nutrition.

**Supplementary Table 1: Mean (standard deviation) intakes of the 92 foods and nutrients investigated in relation to risk of lung cancer in the European Prospective Investigation into Cancer and Nutrition.**

| Food/nutrient             | Smoking status       |                    |                    |                     |
|---------------------------|----------------------|--------------------|--------------------|---------------------|
|                           | Overall, N = 327,790 | Never, N = 194,087 | Former, N = 68,129 | Current, N = 65,574 |
| Apple/pear (g/d)          | 72 (87)              | 71 (88)            | 84 (92)            | 64 (81)             |
| Banana (g/d)              | 24 (37)              | 25 (38)            | 27 (38)            | 20 (32)             |
| Beef (g/d)                | 16 (19)              | 14 (17)            | 19 (21)            | 20 (21)             |
| Beer/cider (g/d)          | 94 (246)             | 59 (158)           | 130 (289)          | 158 (365)           |
| Berries (g/d)             | 8 (12)               | 9 (13)             | 7 (11)             | 6 (10)              |
| Breakfast cereal (g/d)    | 16 (41)              | 19 (45)            | 15 (39)            | 8 (24)              |
| Biscuits (g/d)            | 7 (13)               | 7 (13)             | 7 (13)             | 6 (12)              |
| Bread (g/d)               | 127 (79)             | 121 (78)           | 136 (80)           | 137 (81)            |
| Non-white bread (g/d)     | 69 (74)              | 58 (71)            | 89 (76)            | 80 (74)             |
| White bread (g/d)         | 53 (74)              | 57 (75)            | 42 (68)            | 52 (75)             |
| Butter (g/d)              | 4 (8)                | 4 (8)              | 4 (8)              | 4 (8)               |
| Cabbage (g/d)             | 23 (31)              | 23 (31)            | 25 (34)            | 19 (27)             |
| Cake (g/d)                | 34 (39)              | 37 (40)            | 31 (38)            | 28 (37)             |
| Cheese (g/d)              | 38 (34)              | 39 (34)            | 38 (33)            | 37 (33)             |
| Chocolate (g/d)           | 8 (14)               | 8 (14)             | 8 (13)             | 8 (14)              |
| Citrus fruit (g/d)        | 50 (64)              | 52 (64)            | 50 (65)            | 44 (64)             |
| Coffee (g/d)              | 381 (373)            | 316 (314)          | 414 (377)          | 538 (467)           |
| Cream puddings (g/d)      | 14 (23)              | 15 (24)            | 13 (21)            | 12 (20)             |
| Crispbread (g/d)          | 8 (16)               | 9 (18)             | 6 (13)             | 5 (12)              |
| Eggs (g/d)                | 18 (17)              | 18 (17)            | 18 (16)            | 20 (18)             |
| Fish (g/d)                | 29 (32)              | 28 (29)            | 30 (34)            | 33 (36)             |
| Fatty fish (g/d)          | 12 (15)              | 11 (14)            | 12 (16)            | 13 (16)             |
| Lean fish (g/d)           | 18 (24)              | 17 (22)            | 19 (26)            | 21 (28)             |
| Fish products (g/d)       | 6 (9)                | 5 (8)              | 6 (9)              | 6 (9)               |
| Fortified wine (g/d)      | 4 (15)               | 4 (12)             | 4 (18)             | 4 (21)              |
| Fruit (g/d)               | 231 (181)            | 247 (182)          | 227 (180)          | 186 (170)           |
| Fruiting vegetables (g/d) | 61 (52)              | 63 (53)            | 60 (51)            | 54 (50)             |

| <b>Food/nutrient</b>        | <b>Smoking status</b>       |                           |                           |                            |
|-----------------------------|-----------------------------|---------------------------|---------------------------|----------------------------|
|                             | <b>Overall, N = 327,790</b> | <b>Never, N = 194,087</b> | <b>Former, N = 68,129</b> | <b>Current, N = 65,574</b> |
| Fruit/vegetable juice (g/d) | 68 (117)                    | 68 (113)                  | 72 (123)                  | 64 (122)                   |
| Grapes (g/d)                | 10 (15)                     | 11 (16)                   | 10 (15)                   | 8 (13)                     |
| Ice cream (g/d)             | 7 (11)                      | 7 (11)                    | 8 (12)                    | 6 (11)                     |
| Lamb (g/d)                  | 3.6 (7.3)                   | 4.2 (7.9)                 | 2.7 (5.9)                 | 2.9 (6.6)                  |
| Leafy vegetables (g/d)      | 30 (40)                     | 34 (42)                   | 24 (35)                   | 25 (38)                    |
| Legumes (g/d)               | 16 (25)                     | 16 (24)                   | 14 (24)                   | 15 (28)                    |
| Liver (g/d)                 | 2.2 (4.4)                   | 2.2 (4.7)                 | 1.9 (3.4)                 | 2.4 (4.2)                  |
| Margarine (g/d)             | 11 (15)                     | 11 (15)                   | 11 (13)                   | 12 (14)                    |
| Vegetable margarine (g/d)   | 7 (12)                      | 7 (12)                    | 6 (11)                    | 6 (10)                     |
| Mayonnaise (g/d)            | 2.7 (5.8)                   | 2.5 (5.6)                 | 3.0 (6.2)                 | 3.0 (5.9)                  |
| Molluscs (g/d)              | 3.5 (5.9)                   | 3.4 (5.9)                 | 3.6 (5.9)                 | 3.9 (6.0)                  |
| Mushrooms (g/d)             | 5.6 (8.6)                   | 6.0 (8.8)                 | 5.4 (8.6)                 | 4.6 (7.6)                  |
| Nuts (g/d)                  | 3.9 (8.5)                   | 3.8 (8.1)                 | 4.2 (9.3)                 | 3.7 (8.8)                  |
| Offal (g/d)                 | 2.8 (5.8)                   | 2.9 (6.5)                 | 2.2 (4.0)                 | 2.9 (5.0)                  |
| Onion/garlic (g/d)          | 12 (13)                     | 10 (13)                   | 13 (14)                   | 14 (14)                    |
| Pasta/grains (g/d)          | 66 (67)                     | 66 (62)                   | 69 (75)                   | 65 (72)                    |
| Pod vegetables (g/d)        | 9 (12)                      | 10 (13)                   | 8 (12)                    | 6 (9)                      |
| Pork (g/d)                  | 14 (17)                     | 12 (15)                   | 16 (18)                   | 19 (20)                    |
| Potato (g/d)                | 90 (72)                     | 87 (71)                   | 91 (69)                   | 98 (75)                    |
| Poultry (g/d)               | 19 (20)                     | 19 (20)                   | 20 (20)                   | 20 (20)                    |
| Processed meat (g/d)        | 34 (32)                     | 31 (29)                   | 35 (35)                   | 39 (35)                    |
| Other processed meat (g/d)  | 15 (20)                     | 14 (18)                   | 17 (21)                   | 19 (23)                    |
| Alcohol (g/d)               | 12 (17)                     | 9 (13)                    | 16 (19)                   | 18 (23)                    |
| Calcium (mg/d)              | 989 (414)                   | 1,002 (412)               | 990 (408)                 | 951 (427)                  |
| Beta carotene (µg/d)        | 3,423 (2,772)               | 3,629 (2,767)             | 3,351 (2,868)             | 2,886 (2,601)              |
| Carbohydrates (g/d)         | 230 (75)                    | 231 (73)                  | 231 (75)                  | 227 (79)                   |
| Cholesterol (mg/d)          | 323 (151)                   | 315 (148)                 | 320 (149)                 | 349 (159)                  |
| Monounsaturated fats (g/d)  | 29 (13)                     | 29 (12)                   | 30 (13)                   | 31 (14)                    |
| Polyunsaturated fats (g/d)  | 13.2 (5.9)                  | 13.2 (5.8)                | 13.2 (5.9)                | 13.2 (6.1)                 |
| Saturated fats (g/d)        | 31 (13)                     | 31 (13)                   | 30 (12)                   | 31 (13)                    |

| <b>Food/nutrient</b>   | <b>Overall, N = 327,790</b> | <b>Never, N = 194,087</b> | <b>Smoking status</b>     |                            |
|------------------------|-----------------------------|---------------------------|---------------------------|----------------------------|
|                        |                             |                           | <b>Former, N = 68,129</b> | <b>Current, N = 65,574</b> |
| Total fats (g/d)       | 80 (29)                     | 79 (28)                   | 79 (29)                   | 82 (30)                    |
| Animal fats (g/d)      | 37 (18)                     | 36 (18)                   | 37 (18)                   | 39 (19)                    |
| Plant fats (g/d)       | 24 (16)                     | 24 (15)                   | 23 (17)                   | 23 (17)                    |
| Iron (mg/d)            | 13.0 (4.2)                  | 12.9 (4.0)                | 13.3 (4.2)                | 13.1 (4.5)                 |
| Fibre (g/d)            | 23 (8)                      | 23 (8)                    | 24 (8)                    | 22 (8)                     |
| Potassium (mg/d)       | 3,626 (1,023)               | 3,581 (1,008)             | 3,696 (1,027)             | 3,683 (1,055)              |
| Magnesium (mg/d)       | 358 (109)                   | 357 (112)                 | 363 (102)                 | 357 (106)                  |
| Phosphorus (mg/d)      | 1,491 (459)                 | 1,462 (449)               | 1,539 (460)               | 1,526 (479)                |
| Total proteins (g/d)   | 87 (28)                     | 86 (27)                   | 88 (28)                   | 90 (29)                    |
| Animal proteins (g/d)  | 52 (23)                     | 51 (23)                   | 52 (23)                   | 56 (24)                    |
| Plant proteins (g/d)   | 27 (10)                     | 27 (10)                   | 28 (11)                   | 27 (11)                    |
| Retinol (µg/d)         | 816 (714)                   | 798 (703)                 | 796 (672)                 | 891 (782)                  |
| Riboflavin (mg/d)      | 1.82 (0.73)                 | 1.87 (0.75)               | 1.76 (0.69)               | 1.74 (0.70)                |
| Starch (g/d)           | 123 (50)                    | 124 (49)                  | 124 (51)                  | 122 (52)                   |
| Sugar (g/d)            | 103 (43)                    | 104 (42)                  | 102 (43)                  | 99 (48)                    |
| Thiamine (mg/d)        | 1.30 (0.49)                 | 1.32 (0.49)               | 1.30 (0.50)               | 1.25 (0.47)                |
| Vitamin B12 (µg/d)     | 6.6 (3.9)                   | 6.5 (4.1)                 | 6.5 (3.5)                 | 7.0 (3.8)                  |
| Vitamin B6 (mg/d)      | 1.82 (0.59)                 | 1.82 (0.58)               | 1.84 (0.60)               | 1.77 (0.60)                |
| Vitamin C (mg/d)       | 123 (64)                    | 128 (64)                  | 120 (63)                  | 109 (62)                   |
| Vitamin D (µg/d)       | 4.10 (3.39)                 | 3.92 (3.04)               | 4.28 (3.77)               | 4.44 (3.89)                |
| Vitamin E (mg/d)       | 11.7 (5.3)                  | 11.8 (5.3)                | 11.8 (5.2)                | 11.4 (5.3)                 |
| Red meat (g/d)         | 43 (36)                     | 39 (34)                   | 45 (37)                   | 52 (39)                    |
| Root vegetables (g/d)  | 25 (30)                     | 26 (30)                   | 25 (31)                   | 20 (28)                    |
| Sauces (g/d)           | 18 (18)                     | 20 (18)                   | 17 (18)                   | 16 (17)                    |
| Savoury biscuits (g/d) | 3.2 (6.5)                   | 3.1 (6.1)                 | 3.4 (7.0)                 | 3.1 (6.8)                  |
| Soft drinks (g/d)      | 74 (169)                    | 65 (154)                  | 79 (173)                  | 97 (200)                   |
| Soups (g/d)            | 58 (79)                     | 63 (85)                   | 49 (65)                   | 50 (66)                    |
| Spirits (g/d)          | 3.4 (11.8)                  | 2.1 (7.1)                 | 4.7 (13.0)                | 6.5 (19.3)                 |
| Stalk vegetables (g/d) | 10 (12)                     | 10 (13)                   | 10 (13)                   | 8 (10)                     |
| Stone fruit (g/d)      | 31 (45)                     | 36 (49)                   | 26 (39)                   | 24 (38)                    |

| <b>Food/nutrient</b> | <b>Overall, N = 327,790</b> | <b>Never, N = 194,087</b> | <b>Smoking status</b>     |                            |
|----------------------|-----------------------------|---------------------------|---------------------------|----------------------------|
|                      |                             |                           | <b>Former, N = 68,129</b> | <b>Current, N = 65,574</b> |
| Sugars (g/d)         | 18 (20)                     | 18 (20)                   | 16 (18)                   | 17 (21)                    |
| Tea (g/d)            | 189 (307)                   | 193 (306)                 | 216 (326)                 | 145 (288)                  |
| Total milk (g/d)     | 186 (206)                   | 185 (199)                 | 182 (205)                 | 194 (226)                  |
| Wine (g/d)           | 77 (133)                    | 62 (109)                  | 98 (149)                  | 98 (168)                   |
| Yoghurt (g/d)        | 63 (86)                     | 72 (90)                   | 56 (80)                   | 46 (80)                    |

**Supplementary Table 2: Hazard ratios and 95% confidence intervals for lung cancer in EPIC and the NLCS in relation to intakes of the six foods and nutrients identified in the diet-wide association study, overall and for different histological subtypes.**

|                    | Overall                  | Lung cancer subtype      |                          |                          |                          |
|--------------------|--------------------------|--------------------------|--------------------------|--------------------------|--------------------------|
|                    |                          | Squamous cell carcinoma  | Adenocarcinoma           | Large cell carcinoma     | Small cell carcinoma     |
| <b>EPIC</b>        |                          |                          |                          |                          |                          |
| Cases <sup>a</sup> | 1,921                    | 436                      | 922                      | 83                       | 374                      |
|                    | HR (95% CI) <sup>b</sup> | HR (95% CI) <sup>b</sup> | HR (95% CI) <sup>b</sup> | HR (95% CI) <sup>b</sup> | HR (95% CI) <sup>b</sup> |
| Offal              | 1.08 (1.03-1.14)         | 0.98 (0.87-1.11)         | 1.14 (1.05-1.23)         | 1.12 (0.88-1.42)         | 1.05 (0.92-1.20)         |
| Retinol            | 1.06 (1.03-1.10)         | 1.02 (0.94-1.11)         | 1.10 (1.05-1.15)         | 1.00 (0.79-1.28)         | 1.05 (0.95-1.16)         |
| Beer/cider         | 1.04 (1.02-1.07)         | 1.02 (0.97-1.08)         | 1.05 (1.00-1.09)         | 1.08 (0.94-1.23)         | 1.02 (0.96-1.08)         |
| Fibre              | 0.91 (0.87-0.96)         | 0.87 (0.78-0.97)         | 0.95 (0.88-1.02)         | 1.00 (0.79-1.28)         | 0.97 (0.86-1.08)         |
| Vitamin C          | 0.91 (0.86-0.96)         | 0.87 (0.76-1.00)         | 0.93 (0.85-1.02)         | 1.11 (0.88-1.40)         | 0.96 (0.84-1.11)         |
| Fruit              | 0.91 (0.86-0.96)         | 0.86 (0.76-0.98)         | 0.93 (0.86-1.02)         | 1.19 (0.98-1.45)         | 0.99 (0.87-1.14)         |
| <b>NLCS</b>        |                          |                          |                          |                          |                          |
| Cases              | 2,861                    | 1,037                    | 685                      | 445                      | 478                      |
|                    | HR (95% CI) <sup>b</sup> | HR (95% CI) <sup>b</sup> | HR (95% CI) <sup>b</sup> | HR (95% CI) <sup>b</sup> | HR (95% CI) <sup>b</sup> |
| Offal <sup>c</sup> | 1.03 (0.97-1.10)         | 0.99 (0.91-1.07)         | 1.04 (0.94-1.15)         | 1.07 (0.97-1.18)         | 1.05 (0.95-1.16)         |
| Retinol            | 1.03 (0.96-1.10)         | 0.99 (0.91-1.08)         | 1.01 (0.91-1.12)         | 1.08 (0.96-1.20)         | 1.06 (0.95-1.17)         |
| Beer/cider         | 1.03 (0.98-1.09)         | 1.04 (0.98-1.11)         | 1.04 (0.97-1.12)         | 1.04 (0.95-1.13)         | 0.96 (0.88-1.04)         |
| Fibre              | 1.00 (0.93-1.06)         | 0.97 (0.89-1.06)         | 0.98 (0.90-1.07)         | 0.99 (0.89-1.11)         | 1.04 (0.93-1.16)         |
| Vitamin C          | 0.98 (0.91-1.05)         | 0.88 (0.80-0.98)         | 1.00 (0.91-1.10)         | 1.11 (0.98-1.25)         | 0.94 (0.82-1.07)         |
| Fruit              | 0.99 (0.91-1.06)         | 0.86 (0.77-0.95)         | 1.02 (0.92-1.15)         | 1.10 (0.97-1.24)         | 0.98 (0.85-1.12)         |

EPIC, European Prospective Investigation into Cancer and Nutrition; NLCS, Netherlands Cohort Study

<sup>a</sup>106 cases were 'other' subtype.

<sup>b</sup>Estimates are for a one standard deviation increment in intake per day, from Cox proportional hazards models stratified by age at recruitment (in 5-year categories), study centre (EPIC only), sex, and smoking status (never, former, current), and adjusted for number of cigarettes smoked per day (in EPIC: fourths, interacted with smoking status; in NLCS: continuous, centered), cigarette smoking years (in EPIC: fourths, interacted with smoking status; in NLCS: continuous, centered), body mass index (<20, 20-<23, 23-<25, 25-<30, 30-<35, ≥35 kg/m<sup>2</sup>), physical activity (in EPIC, Cambridge index: inactive, moderately inactive, moderately active, active; in NLCS, non-occupational physical activity: ≤30, >30-60, >60-90, >90 min/day), highest level of education (in EPIC: none/primary school, technical/professional school, secondary school, longer education including university; in NLCS: primary school or lower vocational, secondary or medium vocational, higher vocational or university), family history of lung cancer (no, yes; NLCS only), history of diabetes (no, yes), and energy intake (kcal/day, continuous).

<sup>c</sup>For offal, only liver consumption was available in the NLCS.

**Supplementary Table 3: Hazard ratios and 95% confidence intervals for lung cancer in the NLCS in relation to intakes of the six foods and nutrients identified in the diet-wide association study in EPIC, by smoking status at baseline.**

|                    | NLCS                              |                                   |                                   |
|--------------------|-----------------------------------|-----------------------------------|-----------------------------------|
|                    | Never smokers                     | Former smokers                    | Current smokers                   |
| Cases              | 198                               | 886                               | 1,777                             |
|                    | HR (95% CI) per 1 SD <sup>a</sup> | HR (95% CI) per 1 SD <sup>a</sup> | HR (95% CI) per 1 SD <sup>a</sup> |
| Offal <sup>b</sup> | 0.91 (0.75-1.11)                  | 1.14 (1.01-1.28)                  | 1.01 (0.93-1.09)                  |
| Retinol            | 0.93 (0.78-1.10)                  | 1.02 (0.90-1.14)                  | 1.04 (0.95-1.14)                  |
| Beer/cider         | 1.12 (0.81-1.55)                  | 0.99 (0.90-1.10)                  | 1.02 (0.95-1.09)                  |
| Fibre              | 0.97 (0.84-1.12)                  | 0.98 (0.89-1.09)                  | 1.01 (0.92-1.11)                  |
| Vitamin C          | 1.05 (0.89-1.23)                  | 1.02 (0.92-1.14)                  | 0.95 (0.86-1.06)                  |
| Fruit              | 0.92 (0.78-1.09)                  | 1.07 (0.96-1.18)                  | 0.95 (0.85-1.07)                  |

EPIC, European Prospective Investigation into Cancer and Nutrition; NLCS, Netherlands Cohort Study

<sup>a</sup>Estimates are for a one standard deviation increment in intake per day, from Cox proportional hazards models stratified by age at recruitment (50-59, 60-64, 65-69 years), and sex, and adjusted for number of cigarettes smoked per day (continuous, centered), cigarette smoking years (continuous, centered), body mass index (<20, 20-<23, 23-<25, 25-<30, 30-<35, ≥35 kg/m<sup>2</sup>), non-occupational physical activity (≤30, >30-60, >60-90, >90 min/day), highest level of education (primary school or lower vocational, secondary or medium vocational, higher vocational or university), family history of lung cancer (no, yes), history of diabetes (no, yes), and energy intake (kcal/day, continuous).

<sup>b</sup>For offal, only liver consumption was available in the NLCS.

**Supplementary Table 4: Hazard ratios and 95% confidence intervals for lung cancer in the NLCS in relation to intakes of the six foods and nutrients identified in the diet-wide association study in EPIC, by sex.**

|                    | <b>Overall</b>                    | <b>NLCS<br/>Men</b>               | <b>Women</b>                      |
|--------------------|-----------------------------------|-----------------------------------|-----------------------------------|
| Cases              | 2,861                             | 2,413                             | 448                               |
|                    | HR (95% CI) per 1 SD <sup>a</sup> | HR (95% CI) per 1 SD <sup>a</sup> | HR (95% CI) per 1 SD <sup>a</sup> |
| Offal <sup>b</sup> | 1.03 (0.97-1.10)                  | 1.04 (0.97-1.12)                  | 0.97 (0.84-1.12)                  |
| Retinol            | 1.03 (0.96-1.10)                  | 1.01 (0.93-1.09)                  | 1.12 (0.99-1.27)                  |
| Beer/cider         | 1.03 (0.98-1.09)                  | 1.03 (0.98-1.09)                  | 1.28 (0.92-1.77)                  |
| Fibre              | 1.00 (0.93-1.06)                  | 1.00 (0.93-1.08)                  | 0.99 (0.85-1.16)                  |
| Vitamin C          | 0.98 (0.91-1.05)                  | 0.95 (0.87-1.03)                  | 1.11 (0.96-1.28)                  |
| Fruit              | 0.99 (0.91-1.06)                  | 0.98 (0.90-1.07)                  | 1.03 (0.88-1.20)                  |

EPIC, European Prospective Investigation into Cancer and Nutrition; NLCS, Netherlands Cohort Study

<sup>a</sup>Estimates are for a one standard deviation increment in intake per day, from Cox proportional hazards models stratified by age at recruitment (50-59, 60-64, 65-69 years), and smoking status (never, former, current), and adjusted for number of cigarettes smoked per day (continuous, centered), cigarette smoking years (continuous, centered), body mass index (<20, 20-<23, 23-<25, 25-<30, 30-<35, ≥35 kg/m<sup>2</sup>), non-occupational physical activity (≤30, >30-60, >60-90, >90 min/day), highest level of education (primary school or lower vocational, secondary or medium vocational, higher vocational or university), family history of lung cancer (no, yes), history of diabetes (no, yes), and energy intake (kcal/day, continuous).

<sup>b</sup>For offal, only liver consumption was available in the NLCS.



**Supplementary Figure 1: Estimated rate ratios and 95% confidence intervals of lung cancer for intakes of the six foods and nutrients identified in the European Prospective Investigation into Cancer and Nutrition, before and after adjusting for circulating concentrations of cotinine.** Green points are estimates from the full cohort, unadjusted for cotinine. Yellow points are from conditional logistic regression models using a nested case-control sample, additionally adjusted for four categories of circulating cotinine. Estimates are for a one standard deviation increment in daily intake of each food or nutrient from models stratified by age at recruitment (<40, 40-44, 45-49, 50-54, 55-59, 60-64, 65-69, 70-74,  $\geq 75$  years), study centre, sex, and smoking status (never, former, current), and adjusted for number of cigarettes smoked per day (fourths) interacted with smoking status, cigarette smoking years (fourths) interacted with smoking status, body mass index (<20, 20- $<23$ , 23- $<25$ , 25- $<30$ , 30- $<35$ ,  $\geq 35$  kg/m<sup>2</sup>), physical activity (inactive, moderately inactive, moderately active, active), highest level of education (none/primary school, technical/professional school, secondary school, longer education including university), history of diabetes (no, yes), and energy intake (kcal/day, continuous).

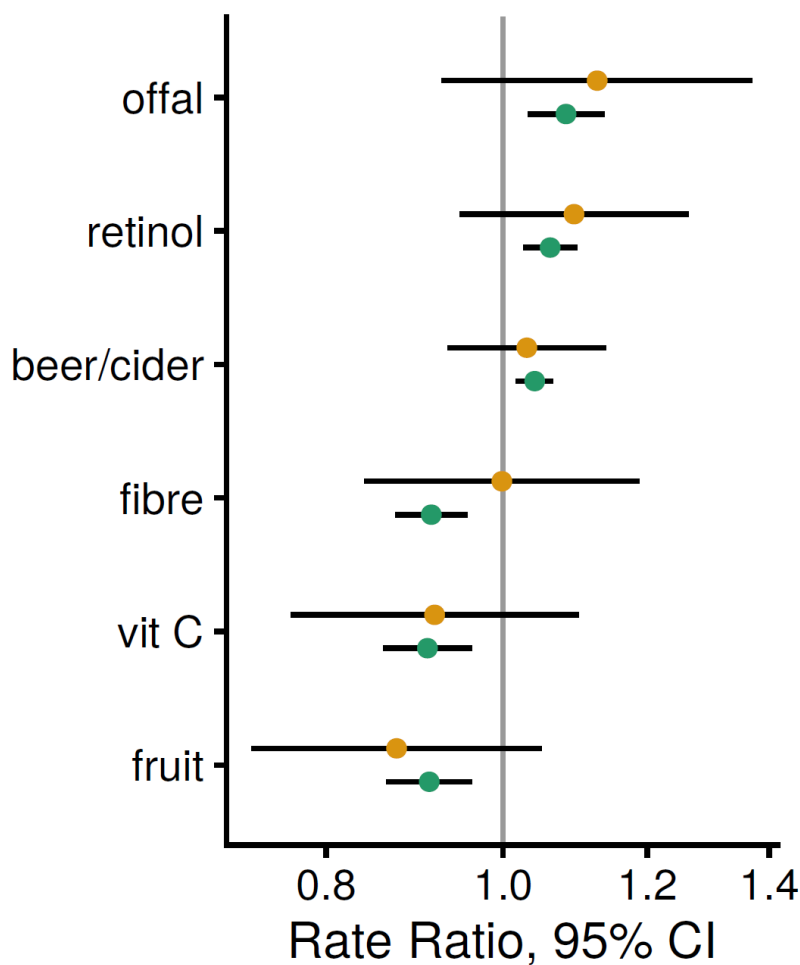

Supplement: IJC-151-1935-s001.pdf [file IJC-151-1935-s001.pdf]
